# Supplementary material for: Hierarchically porous CsPbBr3@HZIF-8 heterojunctions for high-performance photocatalytic degradation of antibiotics in high-salinity wastewater
Source: Royal Society of Chemistry journal article supplement (doi:10.1039/d3tc02493h), 2023-01-01
Supplement: d3tc02493h1.pdf [file d3tc02493h1.pdf]

# Hierarchical porous CsPbBr<sub>3</sub>@HZIF-8 heterojunction for high-performance photocatalytic degradation of antibiotics in high-salinity wastewater

Yangwen Hou,<sup>a</sup> Fanfei Meng,<sup>b</sup> Jingting He,<sup>a</sup> Man Dong,<sup>c</sup> Jialin Tong,<sup>c</sup> Jing Sun,<sup>b</sup> Chunyi Sun,<sup>\*c</sup> Xinlong Wang,<sup>c</sup> and Zhongmin Su<sup>\*b,d</sup>

<sup>a</sup>School of Materials Science and Engineering, Changchun University of Science and Technology, Changchun 130022, China

<sup>b</sup>Jilin Provincial Science and Technology Innovation Center of Optical Materials and Chemistry, School of Chemistry and Environmental Engineering, Changchun University of Science and Technology Changchun, Changchun, 130022 Jilin, China

<sup>c</sup>Key Laboratory of Polyoxometalate Science of Ministry of Education, Northeast Normal University, Changchun, 130024 Jilin, China

<sup>d</sup>State Key Laboratory of Supramolecular Structure and Materials, Institute of Theoretical Chemistry, College of Chemistry, Jilin University, Changchun 130021, China

\* Corresponding author.

E-mail addresses: suncy009@nenu.edu.cn (C. Sun), zmsu@nenu.edu.cn (Z. Su).

## 1. Experimental Section

### 1.1 Chemical Reagents

Zinc nitrate hexahydrate (Zn(NO<sub>3</sub>)<sub>2</sub>·6H<sub>2</sub>O, 99.0%), Zinc sulfate heptahydrate (ZnSO<sub>4</sub>·7H<sub>2</sub>O, AR), 2-Methylimidazole (C<sub>4</sub>H<sub>6</sub>N<sub>2</sub>, 98.0%), lead bromide (PbBr<sub>2</sub>, 99.9%), cesium bromide (CsBr, 99.0%), oleic acid (OA, 80%-90%), oleylamine (OAm, 90.0%), Dimethyl sulfoxide (DMSO, C<sub>2</sub>H<sub>6</sub>SO, >99.0%), toluene (C<sub>7</sub>H<sub>8</sub>, 99.0%), N, N-dimethylformamide (DMF, C<sub>3</sub>H<sub>7</sub>NO, 99.5%), methanol (CH<sub>3</sub>OH, 99.5%), ethanol (CH<sub>3</sub>CH<sub>2</sub>OH, 99.5%), Tetracycline hydrochloride (C<sub>22</sub>H<sub>24</sub>N<sub>2</sub>O<sub>8</sub>·HCl, 96%), L-Histidine (C<sub>6</sub>H<sub>9</sub>N<sub>3</sub>O<sub>2</sub>, > 99.0%), triethanolamine (TEOA, C<sub>6</sub>H<sub>15</sub>NO<sub>3</sub>, 98.0%), benzoquinone (BQ, C<sub>6</sub>H<sub>4</sub>O<sub>2</sub>, 99.0%), and isopropyl alcohol (IPA, C<sub>3</sub>H<sub>8</sub>O, 98.0%) were purchased from Aladdin Co. Ltd.

### 1.2 Characterization.

Powder X-ray diffraction (PXRD) analysis was conducted using an X-ray diffractometer (Rigaku, Japan) equipped with Cu K $\alpha$  radiation. Transmission electron microscopy (TEM) images were acquired using JEOL, JEM-2100F. The surface morphology of the fabricated material were examined using scanning electron microscopy (SEM) with a FEI Quanta 600 instrument. UV-visible diffuse reflectance spectroscopy (UV-Vis DRS) measurements were carried out using a Shimadzu UV-2600 UV-visible spectrophotometer (Japan). X-ray photoelectron spectroscopy (XPS) analysis was conducted using a Thermo ESCALAB 250Xi instrument with Al K $\alpha$  X-ray radiation. Ultraviolet photoelectron spectroscopy (UPS) was carried out by X-ray photoelectron spectroscopy (PHI5000 VersaProbe III). FTIR spectra were obtained using an attenuated total reflectance (ATR) mode on a Nicolet iS 50 instrument (Thermo Fisher, USA). Photoluminescence (PL) emission spectra were collected using a fluorescence spectrophotometer (F7000, Hitachi, Japan). Time-resolved photoluminescence (TRPL) spectra were recorded on a fluorescence lifetime spectrophotometer (FLS 1000, Edinburgh, UK) with an excitation wavelength of 325 nm. Electrochemical measurements were performed using an electrochemical analyzer (CHI660C, CH Instruments,

Shanghai). The counter electrode, reference electrode, and electrolyte used in the measurements were Pt wire, Ag/AgCl (saturated KCl), and a 0.5 M Na<sub>2</sub>SO<sub>4</sub> solution, respectively.

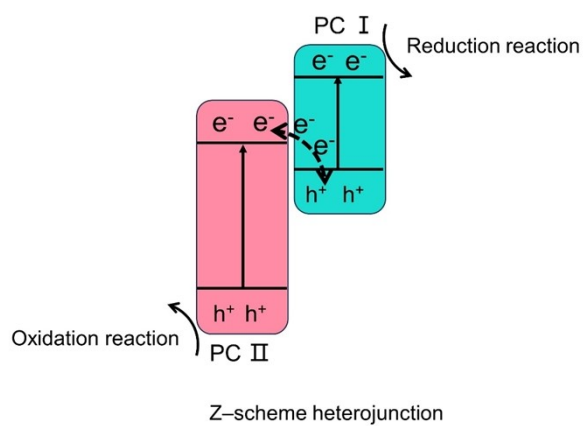

Fig.S1. Schematic illustration of charge carrier transfer in direct Z-scheme photocatalysts (this work).

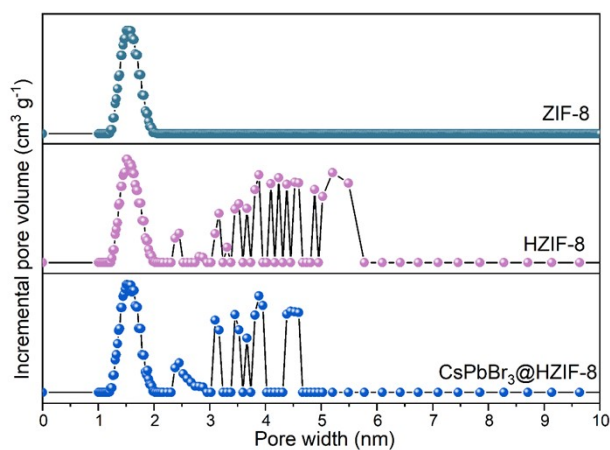

Fig.S2. Pore size distributions based on density-functional theory (DFT) analysis of ZIF-8 and HZIF-8 and CsPbBr<sub>3</sub>@HZIF-8.

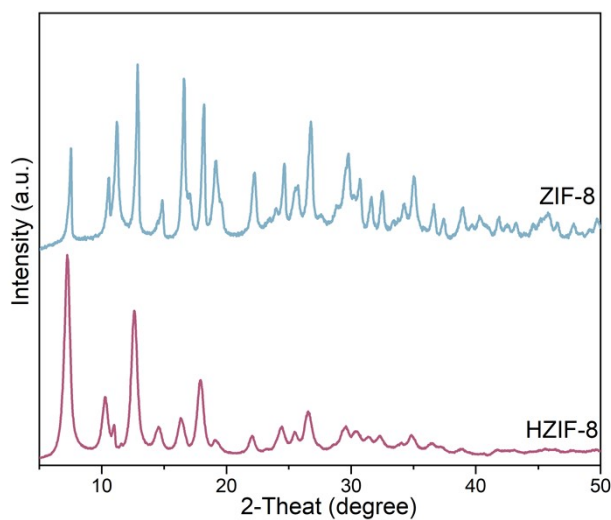

Fig.S3. PXRD patterns of ZIF-8 and HZIF-8.

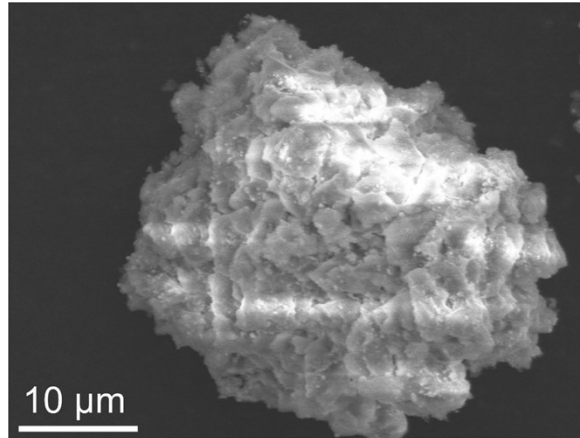

Fig.S4. SEM of 4%-CsPbBr<sub>3</sub>@HZIF-8.

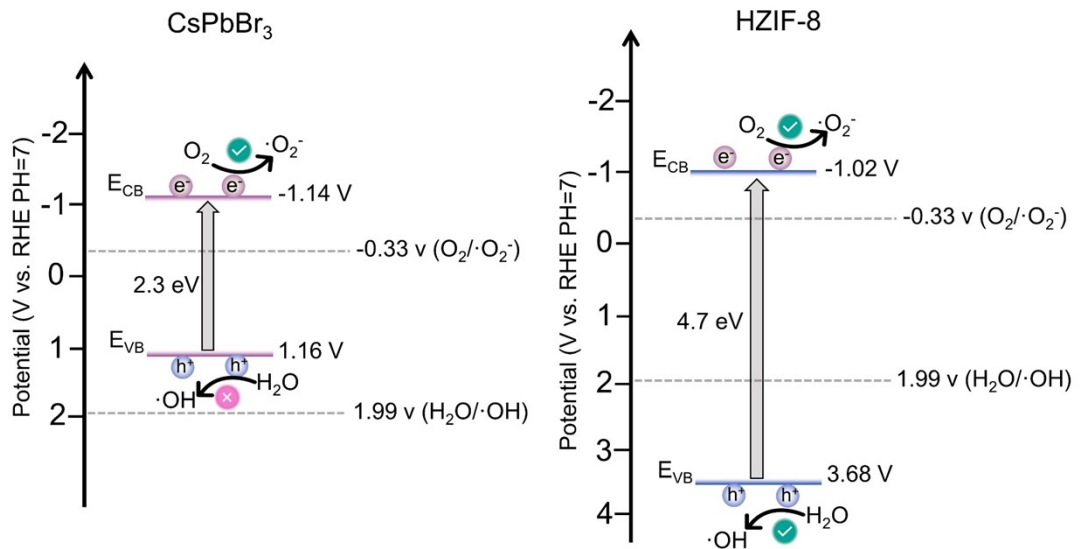

Fig.S5. Band structures of CsPbBr<sub>3</sub> and HZIF-8 from UPS.

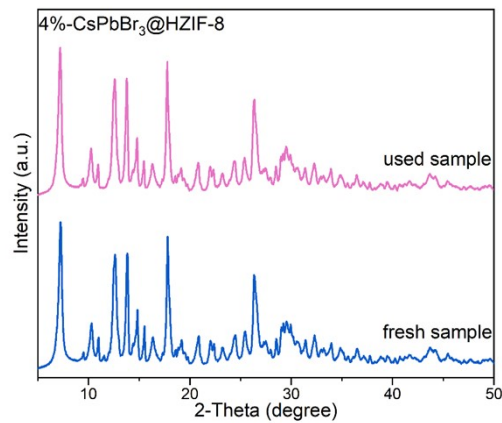

Fig.S6. Post-reaction PXRD of 4%-CsPbBr<sub>3</sub>@HZIF-8.

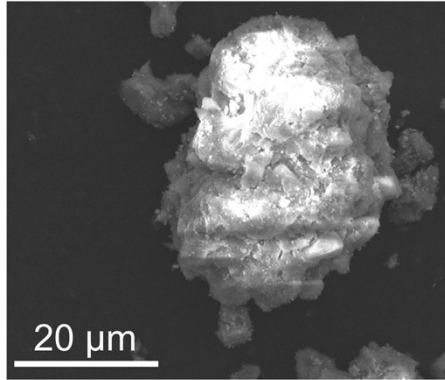

Fig. S7. Post-reaction SEM images of 4%-CsPbBr<sub>3</sub>@HZIF-8.

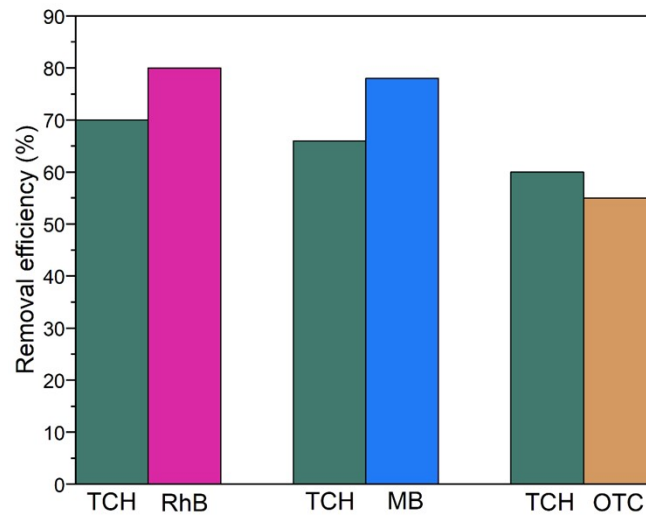

Fig.S8. 4%-CsPbBr<sub>3</sub>@ZIF-8 for degradation of pollutants in the coexistence system.

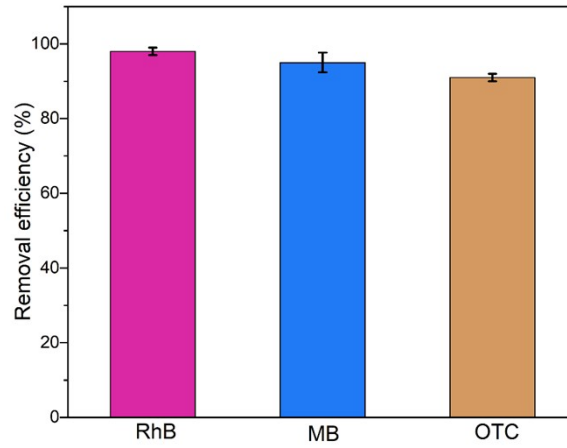

Fig.S9. 4%-CsPbBr<sub>3</sub>@ZIF-8 for degradation of different pollutants.

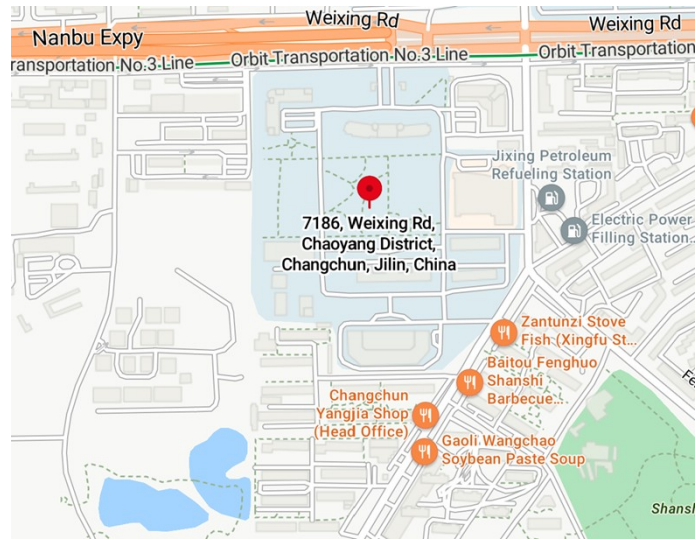

Fig. S10. Map of tap water sources.

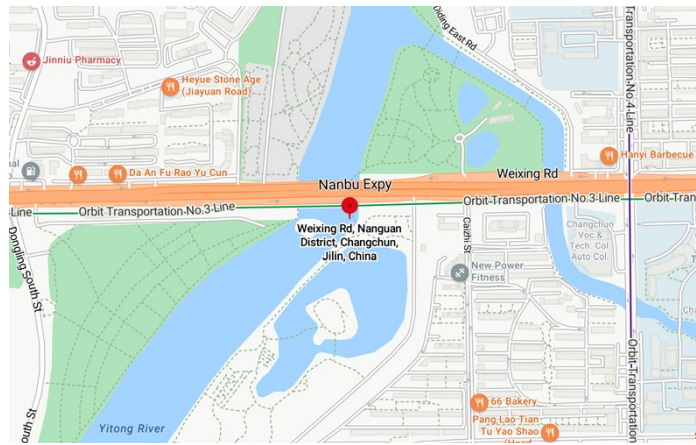

Fig.S11. Map of river sources.

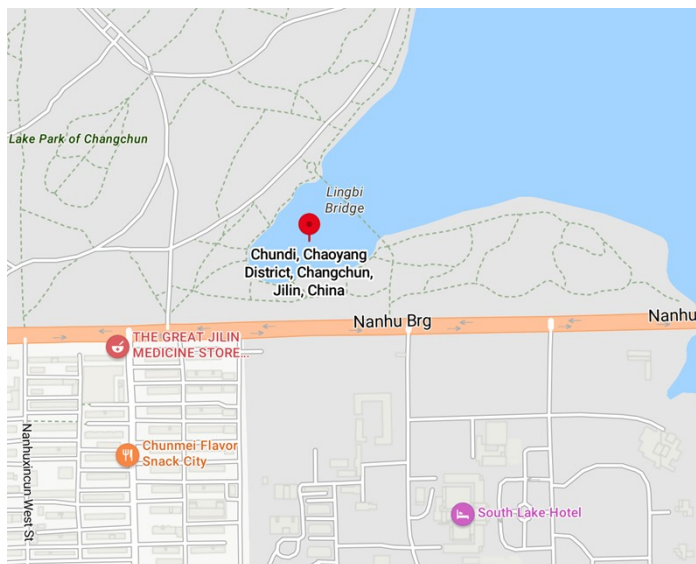

Fig.S12. Map of lake sources.

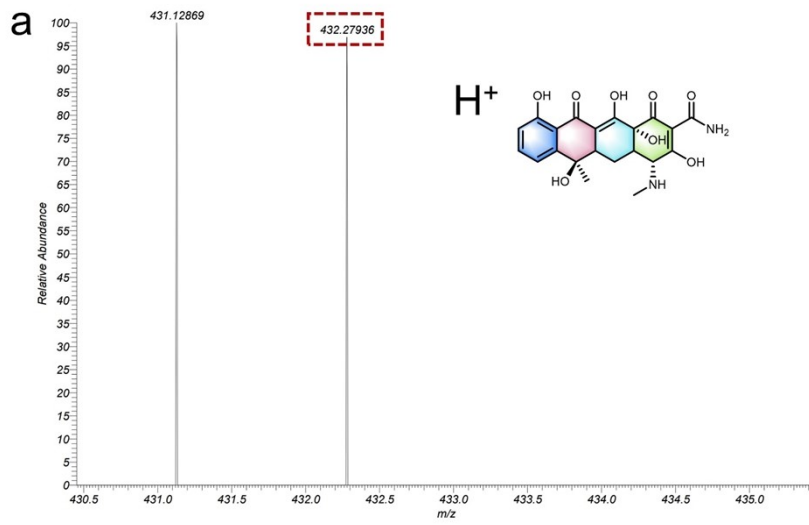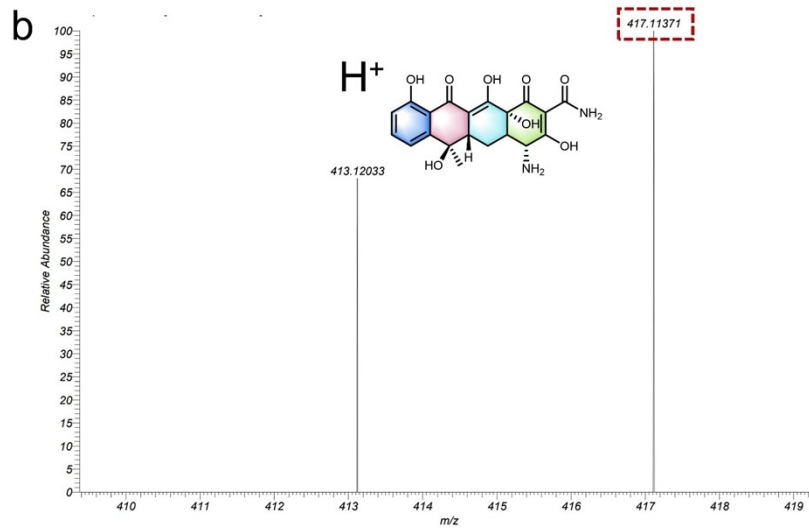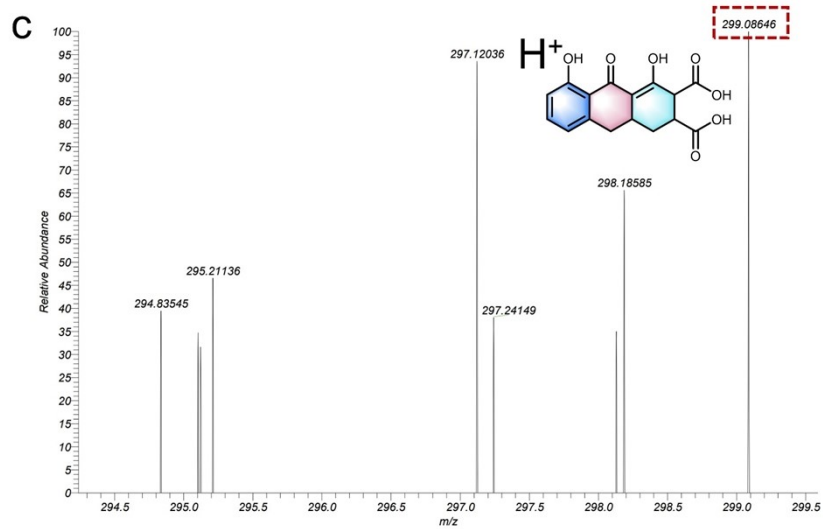

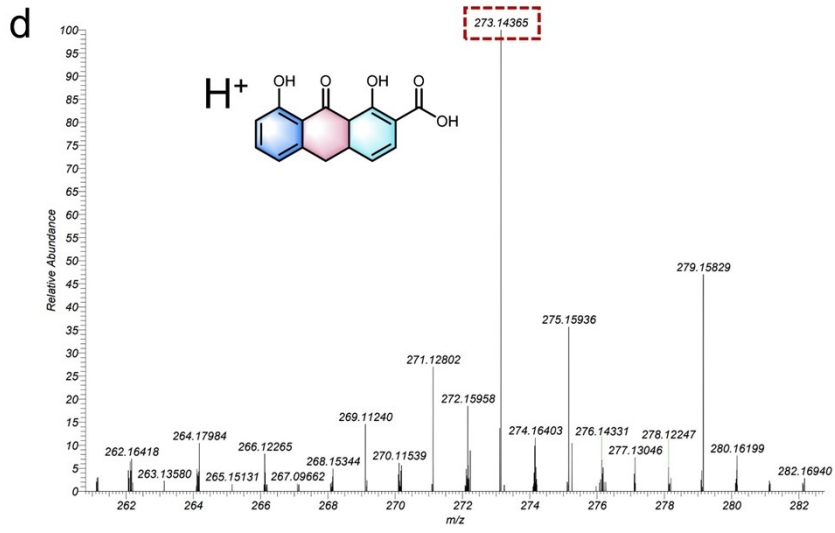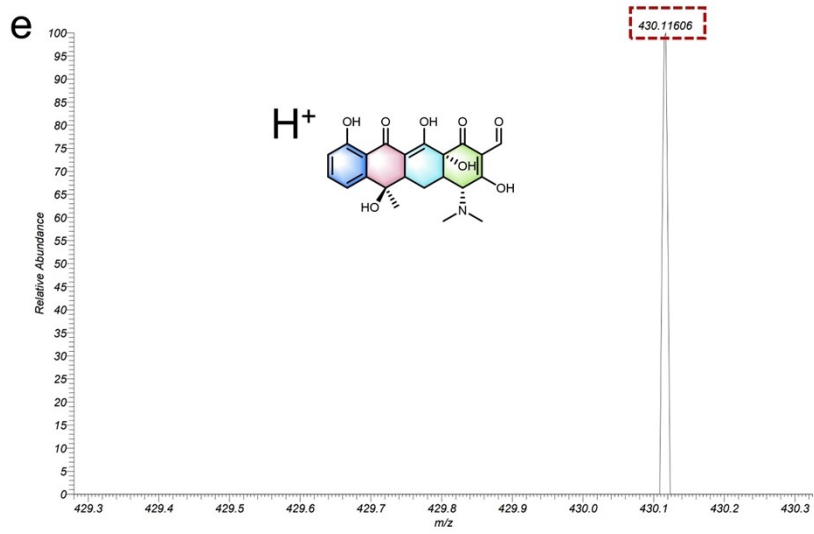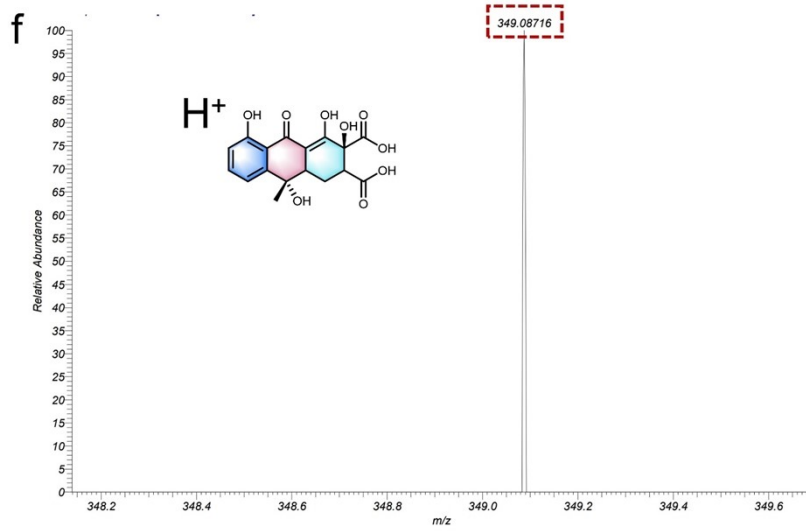

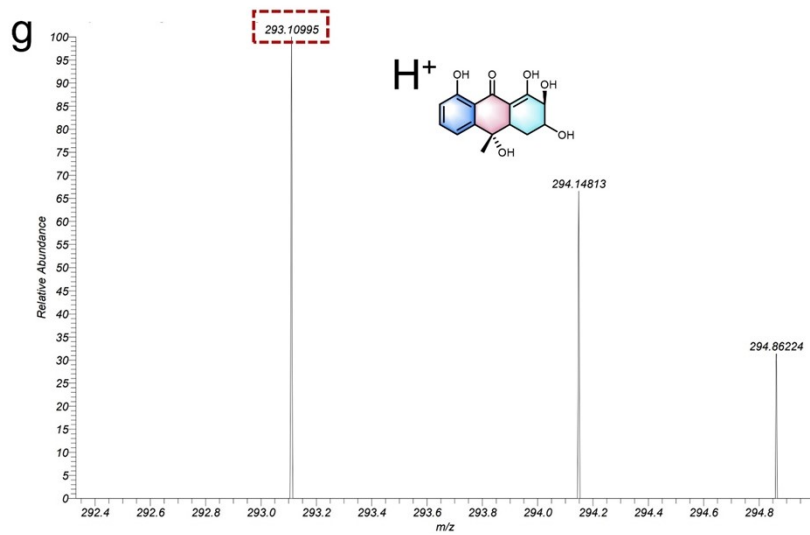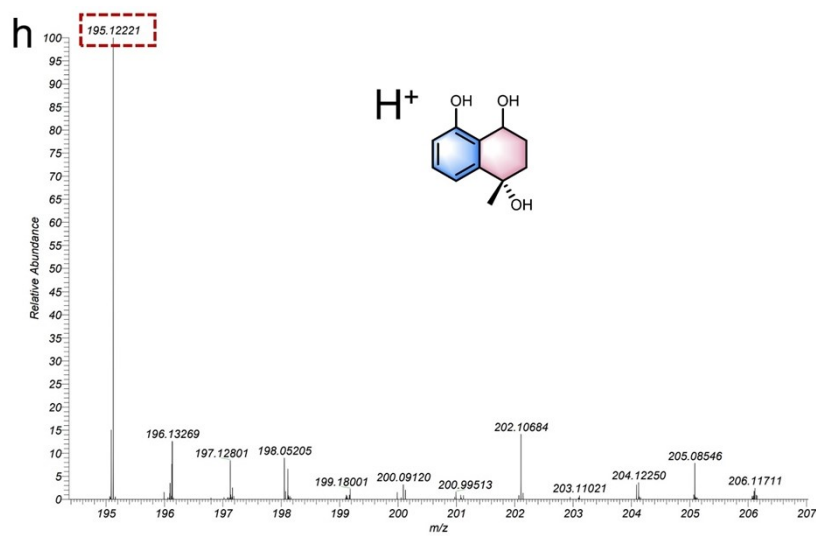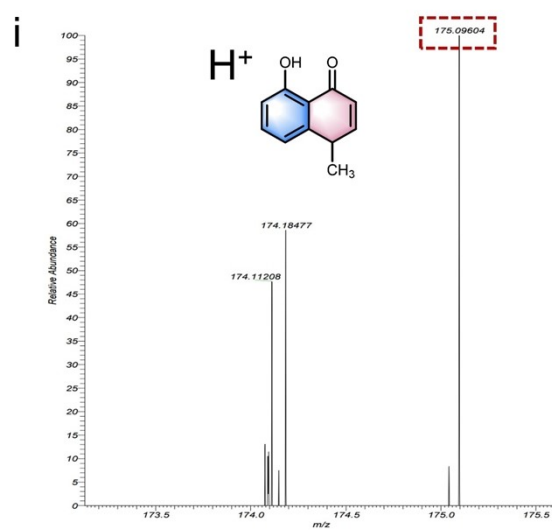

Fig. S13. Spectra of degradation intermediates (a-I, P1-P9).



Table S1. Photocatalytic degradation of TCH by various photocatalysts.

| Photocatalyst (amount)                                                                    | Organics<br>(Concentration) | Irradiation time | Light source                       | Degradatio<br>n |           |
|-------------------------------------------------------------------------------------------|-----------------------------|------------------|------------------------------------|-----------------|-----------|
| CsPbBr <sub>3</sub> @HZIF-8 (15 mg)                                                       | 30 mL TCH (10 mg/L)         | 40 min           | 300W Xe-lamp ( $\lambda > 420$ nm) | 94%             | This work |
| CsPbBr <sub>3</sub> -TiO <sub>2</sub> (50 mg)                                             | 100 mL TCH (20 mg/L)        | 60 min           | 300W Xe-lamp ( $\lambda > 420$ nm) | 94%             | 1         |
| CsPbBr <sub>3</sub> @SiO <sub>2</sub> (50 mg)                                             | 100 mL TCH (20 mg/L)        | 120 min          | 300W Xe-lamp ( $\lambda > 420$ nm) | 75%             | 2         |
| CsPbBr <sub>3</sub> QDs (100 mg)                                                          | 100 mL TCH (10 mg/L)        | 30 min           | 300W Xe-lamp ( $\lambda > 420$ nm) | 76%             | 3         |
| ZIS@P20 (8 mg)                                                                            | 40 mL TCH (20 mg/L)         | 60 min           | 800W Xe-lamp ( $\lambda > 420$ nm) | 99.9%           | 4         |
| N-CNT/mpg-C <sub>3</sub> N <sub>4</sub> (50 mg)                                           | 50 mL TCH (20 mg/L)         | 240 min          | 300W Xe-lamp ( $\lambda > 420$ nm) | 67.1%           | 5         |
| $\gamma$ -Fe <sub>2</sub> O <sub>3</sub> /g-C <sub>3</sub> N <sub>4</sub> (50 mg)         | 100 mL TCH (10 mg/L)        | 120 min          | 500W Xe-lamp ( $\lambda > 420$ nm) | 73.8%           | 6         |
| Bi <sub>2</sub> Sn <sub>2</sub> O <sub>7</sub> / Bi <sub>2</sub> MoO <sub>6</sub> (25 mg) | 100 mL TCH (20 mg/L)        | 100 min          | 300W Xe-lamp ( $\lambda > 400$ nm) | 98.7%           | 7         |

Table S2 Time-resolved PL decay parameters of different samples under 365 nm excitation. The two-exponential decay curves were fitted using a non-linear least-squares method with a two-component decay law. The average lifetime ( $\tau_{av}$ ) was then determined using the equation:

$$\tau = \frac{\sum_{i=1}^{i=n} A_i \tau_i^2}{\sum_{i=1}^{i=n} A_i \tau_i}$$

| $\tau_1$ (ns)     | $\tau_2$ (ns)       | $\chi^2$ | $\tau_{av}$ (ns) |
|-------------------|---------------------|----------|------------------|
| 14.59<br>(17.70%) | 46.69<br>(82.30.2%) | 1.077    | 40.99            |
| 7.94<br>(5.23%)   | 29.48<br>(94.77%)   | 1.053    | 28.35            |

Table S3 Characteristics of intermediate products of the degradation of TCH.

| Name | m/z | Supposed Structure                                                                   |
|------|-----|--------------------------------------------------------------------------------------|
| P1   | 431 | 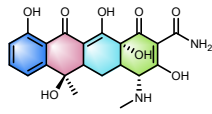   |
| P2   | 416 |    |
| P3   | 298 |    |
| P4   | 272 |    |
| P5   | 429 |    |
| P6   | 348 |   |
| P7   | 292 |  |
| P8   | 194 |  |
| P9   | 174 |  |

## References

- 1 C. Liu, X. Qian, Q. Wei, Z. Chen, J. Chen, W. Wang, X. Chen, J. Gao, Y. Liu and L. Xie, *J. Clean. Prod.*, 2022, **365**, 132830.
- 2 J. Gao, X. Qian, Q. Wei, Z. Chen, C. Liu, W. Wang, J. Chen, X. Chen, Y. Liu and G. Wei, *J. Colloid Interface Sci.*, 2022, **623**, 974–984.
- 3 X. Qian, Z. Chen, X. Yang, W. Zhao, C. Liu, T. Sun, D. Zhou, Q. Yang, G. Wei and M. Fan, *J. Clean. Prod.*, 2020, **249**, 119335.
- 4 P. Jin, L. Wang, X. Ma, R. Lian, J. Huang, H. She, M. Zhang and Q. Wang, *Appl. Catal. B*, 2021, **284**, 119762.
- 5 J. Liu, Y. Song, H. Xu, X. Zhu, J. Lian, Y. Xu, Y. Zhao, L. Huang, H. Ji and H. Li, *J. Colloid Interface Sci.*, 2017, **494**, 38–46.
- 6 C. Li, S. Yu, H. Che, X. Zhang, J. Han, Y. Mao, Y. Wang, C. Liu and H. Dong, *ACS Sustain. Chem. Eng.*, 2018, **6**, 16437–16447.
- 7 S. Li, C. Wang, Y. Liu, M. Cai, Y. Wang, H. Zhang, Y. Guo, W. Zhao, Z. Wang and X. Chen, *Chem. Eng. J.*, 2022, **429**, 132519.
